# Supplementary material
Source: publisher figshare collection journal article supplement (https://frontiersin.figshare.com/ndownloader/files/24755435)
Supplement: Supplementary file [file 24755435]

### 1) Left hippocampus

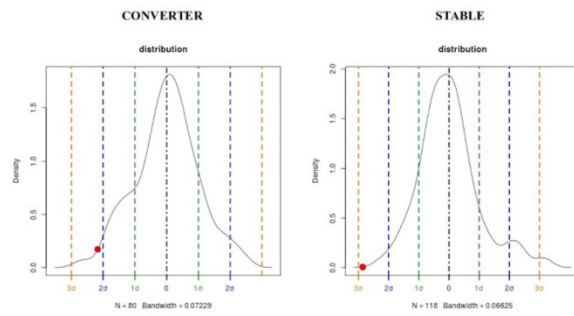

### 2) Right hippocampus

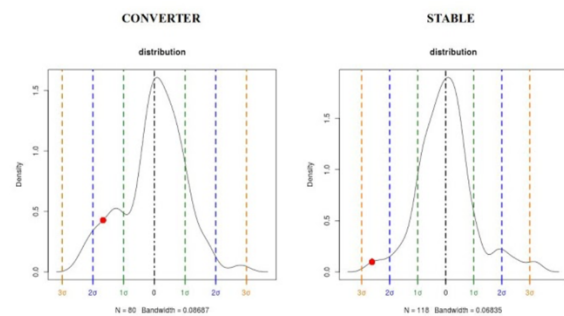

### 3) Left middle cingulate gyrus

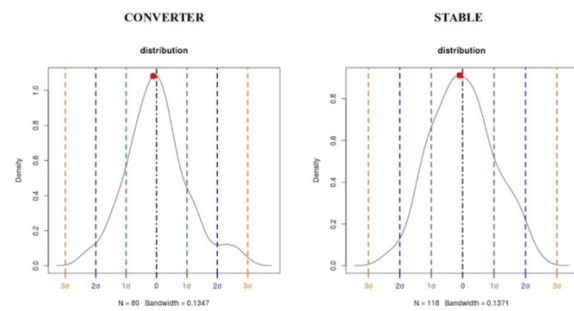

### 4) Left anterior cingulate gyrus

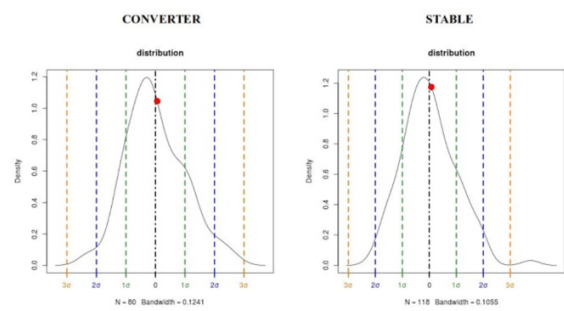

### 5) Left posterior cingulate gyrus

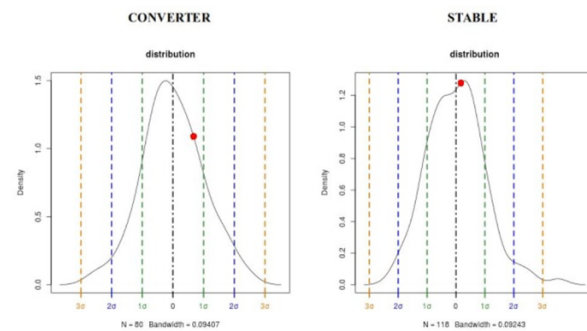

### 6) Right entorhinal volume

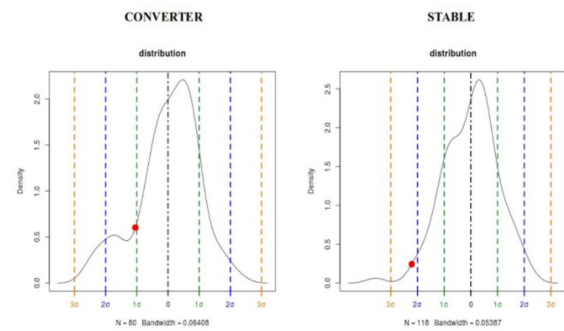

### 7) Left entorhinal volume

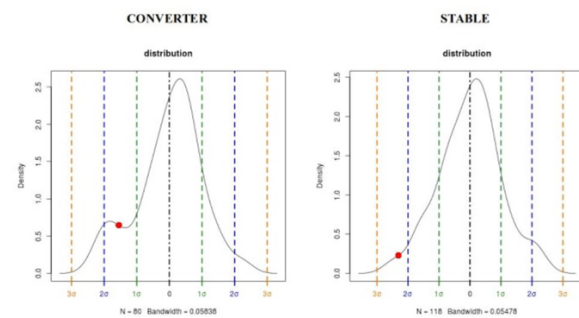

### 8) Right middle temporal gyrus

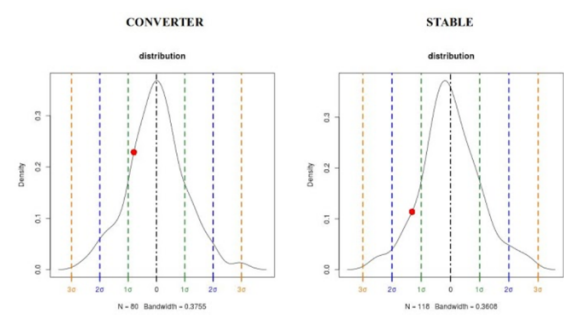

## 9) Right parahippocampal gyrus

## 10) Right superior temporal gyrus

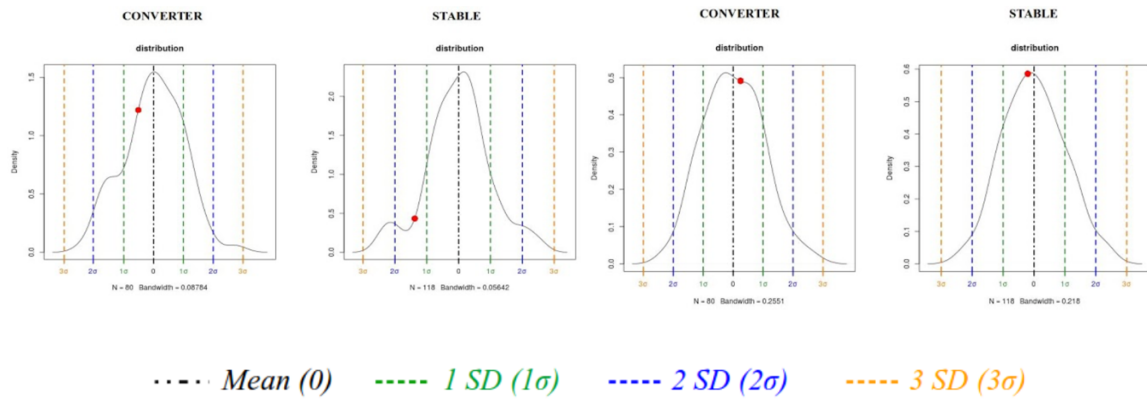

Figure Sup 3 shows an example of the density function distributions and standard deviations from 10 imaging biomarkers that were quantified using the MIP Neuromorphometrics pipeline. The volumetric distribution on the left was derived from MCI CONVERTER and the distribution on the right was derived from MCI STABLE from ADNI data set. Subject value is plotted as a red dot on the density function.
